# Supplementary material for: Antagonistic Gene Activities Determine the Formation of Pattern Elements along the Mediolateral Axis of the Arabidopsis Fruit
Source: PLoS Genet. 2012 Nov 1;8(11):e1003020. doi: 10.1371/journal.pgen.1003020 (PMC3486860; doi:10.1371/journal.pgen.1003020)
Supplement: Table S1 — List of oligonucleotides used in this work. (XLS) [file pgen.1003020.s012.xls]

## Sheet: Hoja1
Table S1.- List of oligonucleotides used in this work
Purpose	Name	Sequence 5' --> 3'	Fragment amplified
Genotyping fil-8	oJD174	GACAATGAAAGTAGTTTTAATGAG	gDNA - W - 259 bp
	oJD175	CAGCTTTGATACGTTGGATCTCTCCTCC	gDNA - M - 207 bp
	Ds3 – 3	TCGTTTCCGTCCCGCAAGT
Genotyping yab3-2	oJD172	GACTCCATGTCGAGCATGTCCATG	gDNA - W - 200 bp
	oJD173	CTAGTAATTCATGTGAAACCCTAGC	gDNA - M - 270 bp
	oJD177	ACGGTCGGGAAACTAGCTCTAC
Genotyping jag-1	oJD126	TTAGTTTCCACACGCAGAGAGAG	gDNA - W - 700 bp
	oJD127	TCATGTGGCCACCAAGAGCTTG
	JL202	CATTTTATAATAACGCTGCGGACATCTAC	gDNA - M - 1100 bp
	N0681	GGATCCAACTCAGAGCGAGTGATGATCTTG
qRT-PCR OTC	OTC - F	TGAAGGGACAAAGGTTGTGTATGTT	cDNA - 94 bp
	OTC - R	CGCAGACAAAGTGGAATGGA
qRT-PCR BP	qKNAT1 - F	CCATTCAGGAAGCAATGGAGTT	cDNA - 101 bp
	qKNAT1 - R	ACTCTTCCCATCAGGATTGTTGA
qRT-PCR FUL	G-00654	TTG CAA GAT CAC AAC AAT TCG CTT CTC	cDNA - 204 bp
	G-00655	GAG AGT TTG GTT CCG TCA ACG ACG ATG
qRT-PCR FIL	SGR qFIL - Fw	TCCGACCATCTCTGCTATGT	cDNA - 363 bp
	SGR qFIL - Rv	CTGTCTTTTCTCTGGAGGGC
qRT-PCR YAB3	SGR qYAB3 - Fw	CTCTGGGGGTCTATTGGCT	cDNA - 348 bp
	SGR qYAB3 - Rv	GTCCTTGCTGTGAGTGTTCCT
qRT-PCR JAG	SGR qJAG - Fw	GGGACTATCGGCCATGTAAT	cDNA - 277 bp
	SGR qJAG - Rv	TTCTCCTTTCGGCTATCATCA
qRT-PCR CUC1	#629	GCGGCGTAGTTAGTAGAGAGACGAAC	cDNA - 346 bp
	#1720	AGGAAGAACCGTGGGAGGCAGAGAAGGTAG
qRT-PCR CUC2	CUC2 - RT1	AGGCCGTAGTAGTAGTAGGG	cDNA - 385 bp
	CUC2 - RT2	TGAAGGCAAATTCTCTTACC
qRT-PCR AtMYB117/LOF1	At1g26780F	GCTGATGCAAGCACATAGGC	cDNA - 50 bp
	At1g26780R	CTCGCAATCATTGCCCATT
qRT-PCR PTL	SGR qPTL - Fw	GATGAAGTTTCTAGGATTATGTC	cDNA - 300 bp
	SGR qPTL - Rv	TATCAACGTTATGGATGTTGGA
qRT-PCR RPL	SGR qRPL - Fw	TCC ATG CTC GAC GAG GTT T	cDNA - 300 bp
	SGR qRPL - Rv	CTGTATCTGTTGGA AAG GAT G
W, PCR product size for wild-type allele; M, PCR product size for mutant allele.
